# Supplementary material
Source: PubMed Central journal article supplement (PMC3147656)
Supplement: supp_55_8_3729__1.pdf [file supp_55_8_3729__1.pdf]

**Supplemental Material Table 1.** Reproducibility of RT-PCR amplification of the 3' end of Gag (p2/p7/p1/p6)- and Pol (PR/RT/INT)-coding sequences as a single large fragment (3,428 nt) or two overlapping shorter fragments (1,657 and 2,002 nt)

(A) Viral load <1,000 copies/ml

|             |             | Large fragment |   | Two fragments |   |   |
|-------------|-------------|----------------|---|---------------|---|---|
|             |             | n = 5          |   | n = 5         | + | - |
| Replicate 2 | +           | 3              | 1 | 4             | 0 |   |
|             | -           | 1              | 0 | 0             | 1 |   |
|             | Replicate 1 |                |   |               |   |   |

(B) Viral load >1,000 copies/ml

|             |             | Large fragment |   | Two fragments |   |   |
|-------------|-------------|----------------|---|---------------|---|---|
|             |             | n = 15         |   | n = 15        | + | - |
| Replicate 2 | +           | 15             | 0 | 15            | 0 |   |
|             | -           | 0              | 0 | 0             | 0 |   |
|             | Replicate 1 |                |   |               |   |   |

RT-PCR amplification reproducibility involved the analysis of 20 plasma samples from HIV-infected individuals with different viral loads: (A) 1,000 copies/ml (n = 5) and (B) >1,000 copies/ml (i.e., 1,001 – 5,000 copies/ml, n = 5; 5,001 – 10,000 copies/ml, n = 5; and >10,000 copies/ml, n = 5). RT-PCR amplification of a single (p2/p7/p1/p6/PR/RT/INT) or two (p2/p7/p1/p6/PR/5'RT + 3'RT/INT) fragments was performed by two different operators, using different lots of critical reagents over a seven-day period. A perfect (100%) RT-PCR amplification reproducibility was observed using plasma samples with viral loads >1,000 copies/ml. Interestingly, a 100% reproducibility was also obtained when RT-PCR amplifying the two overlapping fragments from plasma samples with <1,000 copies/ml.

**Supplemental Material Table 2.** Different methods used to define biological cutoffs.

| <b>Drug</b> | <b>IC<sub>50</sub> - based <sup>a</sup></b> | <b>Mean + 2SD <sup>b</sup></b> | <b>97.5<sup>th</sup> percentile <sup>c</sup></b> | <b>99<sup>th</sup> percentile <sup>d</sup></b> |
|-------------|---------------------------------------------|--------------------------------|--------------------------------------------------|------------------------------------------------|
| APV         | 1.67                                        | 1.27                           | 1.40                                             | 1.55                                           |
| TPV         | 1.95                                        | 1.67                           | 1.85                                             | 2.20                                           |
| RTV         | 1.78                                        | 1.68                           | 2.09                                             | 2.32                                           |
| IDV         | 1.61                                        | 1.50                           | 1.61                                             | 1.62                                           |
| NFV         | 2.16                                        | 3.15                           | 3.62                                             | 3.81                                           |
| DRV         | 1.72                                        | 1.28                           | 1.29                                             | 1.38                                           |
| SQV         | 2.41                                        | 2.07                           | 2.52                                             | 2.85                                           |
| LPV         | 2.04                                        | 1.45                           | 1.88                                             | 2.14                                           |
| ATV         | 1.98                                        | 1.63                           | 1.52                                             | 2.01                                           |
| EFV         | 2.09                                        | 2.49                           | 2.96                                             | 3.09                                           |
| NVP         | 2.01                                        | 2.22                           | 2.35                                             | 2.89                                           |
| ETR         | 2.06                                        | 1.57                           | 2.14                                             | 2.25                                           |
| DLV         | 2.25                                        | 3.94                           | 4.04                                             | 6.89                                           |
| AZT         | 1.65                                        | 1.82                           | 1.97                                             | 2.37                                           |
| ABC         | 1.51                                        | 1.22                           | 1.33                                             | 1.36                                           |
| 3TC         | 1.64                                        | 1.16                           | 1.19                                             | 1.22                                           |
| FTC         | 1.57                                        | 1.32                           | 1.40                                             | 1.45                                           |
| d4T         | 1.66                                        | 1.23                           | 1.24                                             | 1.31                                           |
| TDF         | 1.45                                        | 1.40                           | 1.39                                             | 1.62                                           |
| ddI         | 1.53                                        | 1.22                           | 1.28                                             | 1.39                                           |
| RAL         | 1.63                                        | 1.44                           | 1.34                                             | 1.34                                           |

Upper BCO values for each antiretroviral drug were calculated using four different criteria, i.e., twice the coefficient of variation of the IC<sub>50</sub> values plus one <sup>a</sup>, the mean FC plus two standard deviations <sup>b</sup>, the 97.5<sup>th</sup> percentile <sup>c</sup> or the 99<sup>th</sup> percentile <sup>d</sup> of the FC distribution.

**A**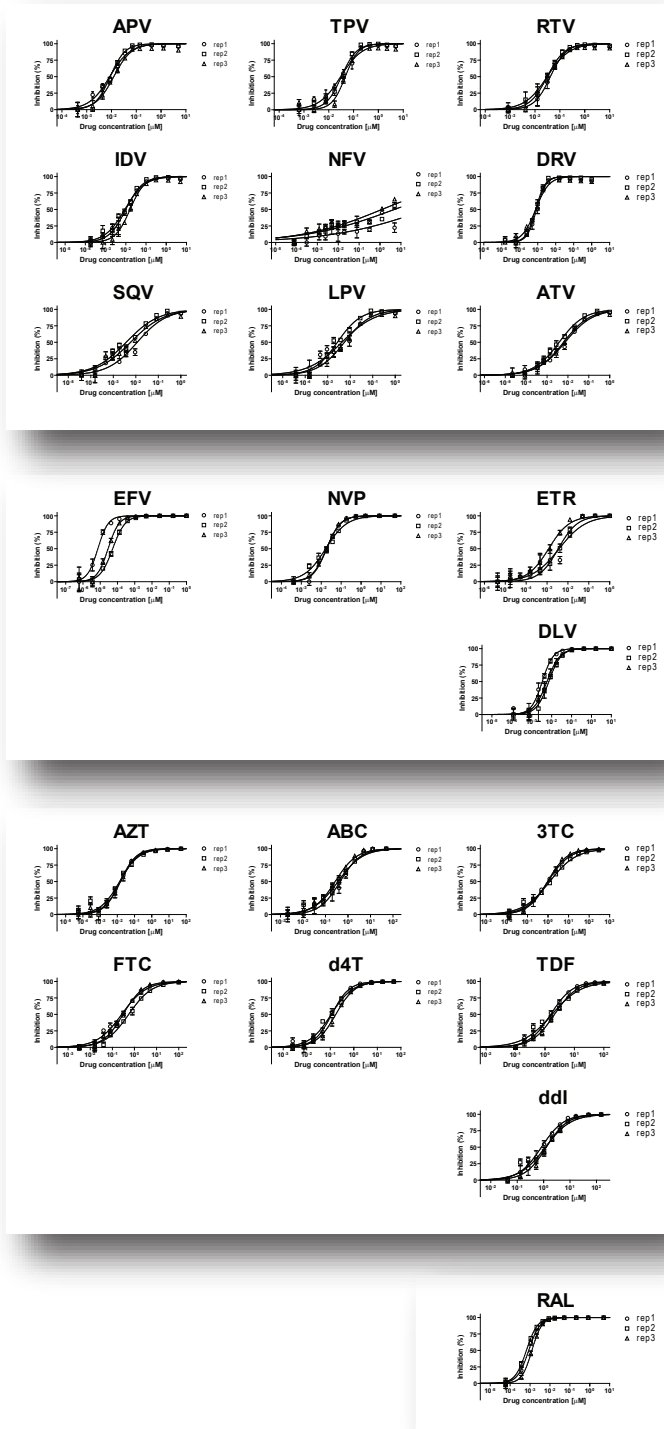**B**

### Fold change in susceptibility to PIs

| Drug | rep-1 | rep-2 | rep-3 |
|------|-------|-------|-------|
| APV  | 0.49  | 0.51  | 0.72  |
| TPV  | 0.51  | 0.55  | 0.79  |
| RTV  | 2.30  | 1.69  | 1.68  |
| IDV  | 1.33  | 1.49  | 2.40  |
| NFV  | >max  | >max  | 829   |
| DRV  | 0.71  | 0.63  | 0.63  |
| SQV  | 8.60  | 2.80  | 4.40  |
| LPV  | 1.48  | 0.94  | 1.93  |
| ATV  | 14.0  | 7.30  | 12.0  |

### Fold change in susceptibility to NNRTIs

| Drug | rep-1 | rep-2 | rep-3 |
|------|-------|-------|-------|
| EFV  | 0.24  | 1.73  | 0.94  |
| NVP  | 1.63  | 1.45  | 1.57  |
| ETR  | 1.14  | 1.03  | 0.36  |
| DLV  | 0.32  | 0.69  | 0.55  |

### Fold change in susceptibility to NRTIs

| Drug | rep-1 | rep-2 | rep-3 |
|------|-------|-------|-------|
| AZT  | 3.30  | 3.00  | 3.50  |
| ABC  | 2.90  | 2.40  | 1.77  |
| 3TC  | 2.40  | 2.90  | 2.30  |
| FTC  | 2.20  | 4.60  | 2.50  |
| d4T  | 1.81  | 1.73  | 2.70  |
| TDF  | 2.20  | 2.40  | 2.90  |
| ddi  | 1.41  | 1.99  | 2.20  |

### Fold change in susceptibility to INSTIs

| Drug | rep-1 | rep-2 | rep-3 |
|------|-------|-------|-------|
| RAL  | 0.55  | 0.42  | 0.79  |

**Supplemental Material Figure 1.** Reproducibility of the entire HIV-1 phenotypic assay. Three aliquots of a plasma sample obtained from a treatment-experienced HIV-infected individual were processed and analyzed in parallel. Phenotypic drug susceptibility profiles (A) and fold-change in susceptibility to PIs, NNRTIs, NRTIs, and INSTI (B) are shown for each independent p2-INT-recombinant virus or replicate (rep). Mutations associated with reduction in drug susceptibility included: PR (L10FHLY, D30DN, A71AT, N88DN), RT (M41LM, T69ADNT, V75IMV, F77FL, T215NSTY), and INT (none).
